# Supplementary material for: Streptococcus thermophilus ST28 Ameliorates Colitis in Mice Partially by Suppression of Inflammatory Th17 Cells
Source: Hindawi journal article supplement (doi:10.1155/2011/378417), 2011-01-01

Supplemental Table 1. Primer sequences used in this study

| Gene           | Sequence                             |
|----------------|--------------------------------------|
| <i>b-actin</i> | Forward 5'-GATTACTGCTCTGGGCCTAGC-3'  |
|                | Reverse 5'-GACTCATCGTACTCCTGCTTGC-3' |
| <i>Rorgt</i>   | Forward 5'-GCAAATACGGTGGTGTGGA-3'    |
|                | Reverse 5'-CGCTGAGGAAGTGGGAAA-3'     |
| <i>Il-17a</i>  | Forward 5'-TGGATTCAGAGGCAGATTCA-3'   |
|                | Reverse 5'-CAGTTTGGGACCCCTTTACA-3'   |
| <i>Cd11c</i>   | Forward 5'-TGTGACGGTGTCTAATGATGG-3'  |
|                | Reverse 5'-AGTTGATGCTGACTGGCACG-3'   |
| <i>Cd86</i>    | Forward 5'-TGTGACGGTGTCTAATGATGG-3'  |
|                | Reverse 5'-CTAGGCTGATTCGGCTTCTT-3'   |

**Supplemental Fig. 1. Effects of *S. thermophilus* ST28 on mRNA expression of IL-17 (A), ROR- $\gamma$ t (B), CD11c (C), and CD86 (D) in LPL from DSS-induced colitis mice.**

RNA was extracted from pooled LPL from DSS-induced colitis mice (n = 4) orally administered ST28, and mRNA expression was examined by real-time RT-PCR. Pooled LPL from untreated DSS-induced colitis mice (-) and healthy control mice (cont) were also analyzed. Data were analysed by the  $\Delta\Delta$ Ct method and presented as fold changes in gene expression compared to healthy control mice.

**A: IL-17**

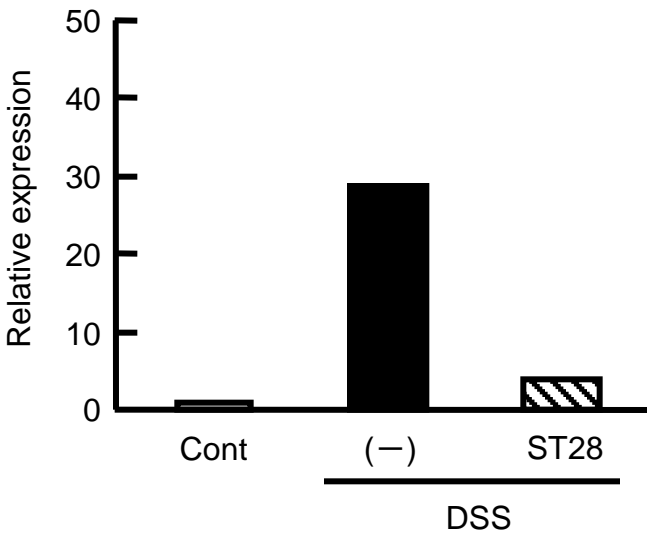

**B: ROR- $\gamma$ t**

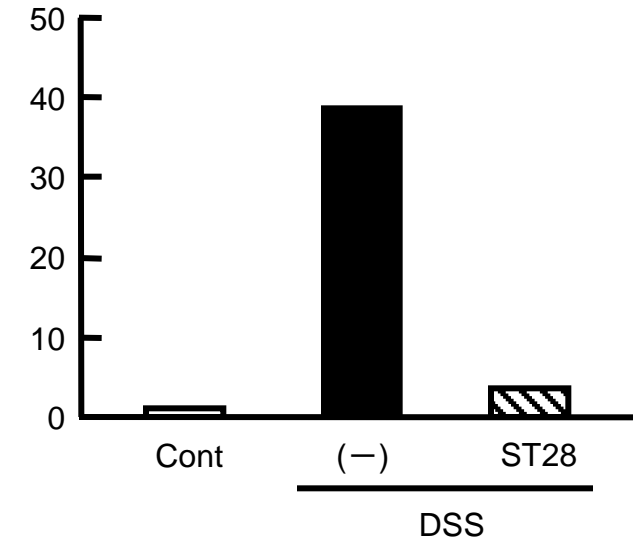

**C: CD11c**

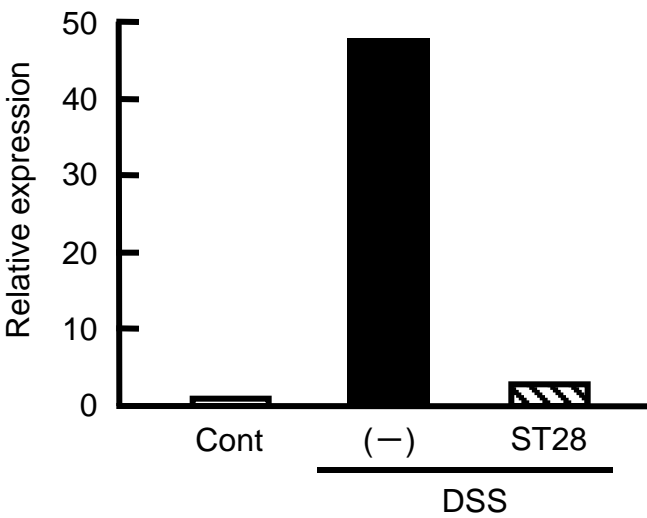

**D: CD86**

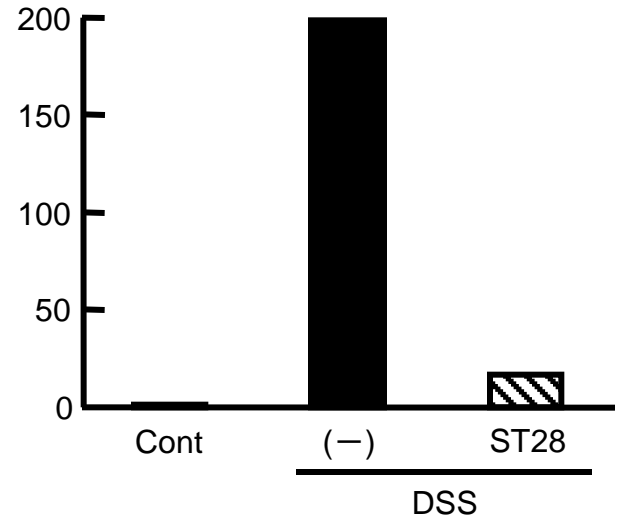

Supplement: f1 [file 378417.f1.pdf]
